# Supplementary material for: Suitability of the In Vitro Cytokinesis-Block Micronucleus Test for Genotoxicity Assessment of TiO2 Nanoparticles on SH-SY5Y Cells
Source: MDPI journal article supplement (doi:10.3390/ijms22168558), 2021-08-09
Supplement: s1 [file s1]

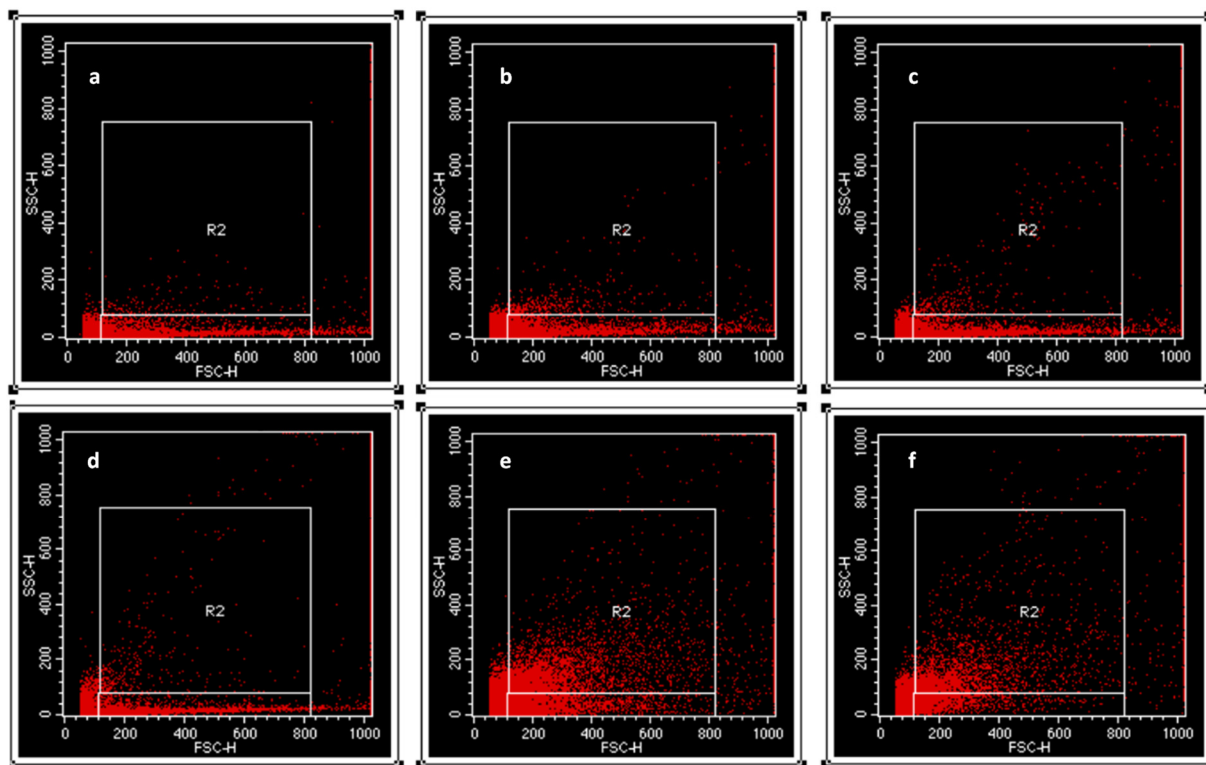

**Figure S1.** Flow cytometry dot plots of cellular uptake analysis of SH-SY5Y cells after 6 h (a-c) and 24 h (d-f) treatments. (a,d) Control cells; (b,e) cells treated with 100 µg/mL TiO<sub>2</sub> NPs in the absence of Cyt-B; (c,f) cells treated with 100 µg/mL TiO<sub>2</sub> NPs in the presence of 6 µg/mL Cyt-B. R2: Region of cells containing NPs.
